# Supplementary material
Source: PubMed Central journal article supplement (PMC5790436)
Supplement: Supp_Fig1.pdf [file Supp_Fig1.pdf]

## Supplementary Data

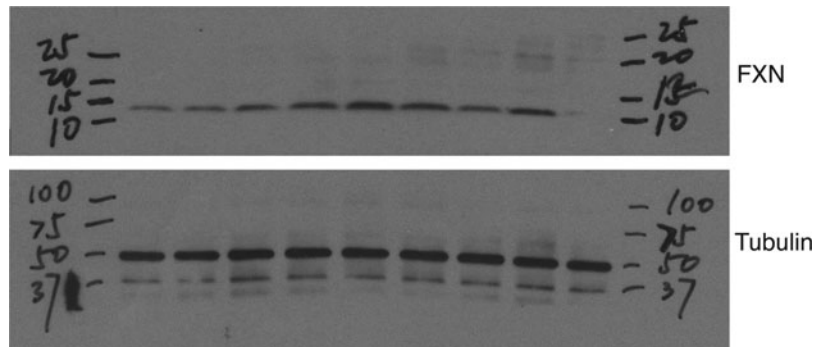

**SUPPLEMENTARY FIG. S1.** Uncropped western blot images in patient-derived GM03816 cells (330/380) using anti-FXN (4F9) and anti-tubulin (T5201; Sigma-Aldrich) antibodies.
