# Supplementary material
Source: PubMed Central journal article supplement (PMC5790436)
Supplement: Supp_Fig2.pdf [file Supp_Fig2.pdf]

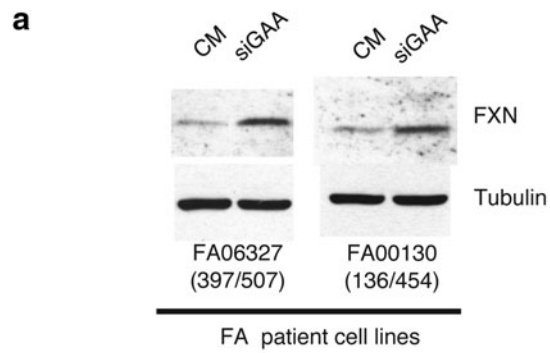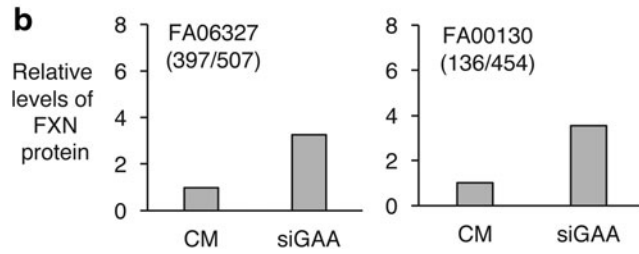

**SUPPLEMENTARY FIG. S2.** Effect on protein expression of adding dsRNA siGAA (25 nM) to homozygous FA patient-derived cell line FA06327 and FA00130. **(a)** Western analysis of FXN protein expression. **(b)** Quantification of data shown in **(a)** ( $n=1$ ). Numbers of GAA repeats in two alleles of patient *FXN* genes are shown in *parenthesis*. dsRNA, duplex RNAs; FA, Friedreich's ataxia.
