# Supplementary material
Source: PubMed Central journal article supplement (PMC5790436)
Supplement: Supp_Fig3.pdf [file Supp_Fig3.pdf]

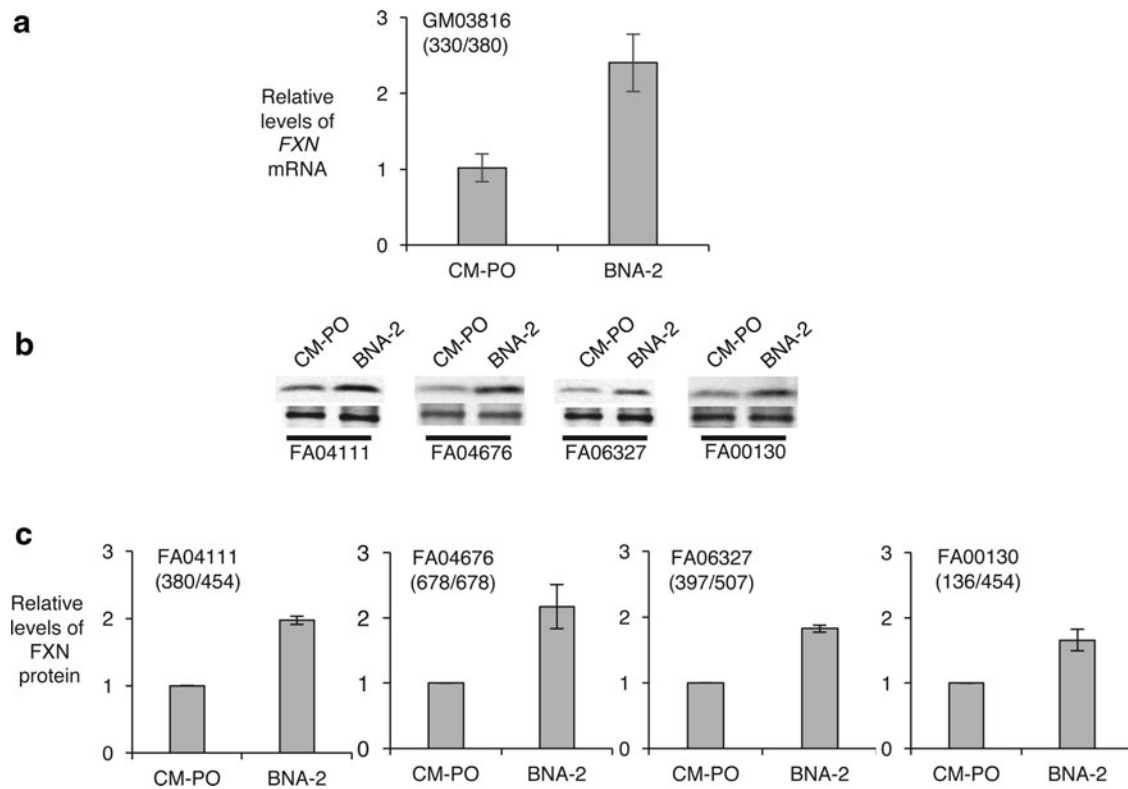

**SUPPLEMENTARY FIG. S3.** Effect on *FXN* expression of adding BNA-2 (12.5 nM) to homozygous FA patient-derived cell lines or a cell line derived from a heterozygous donor. **(a)** Activation of *FXN* mRNA expression upon addition of 12.5 nM BNA-2 ( $n=3$ ) in GM03816. **(b)** Western analysis of *FXN* protein expression in different FRDA cell lines. **(c)** Quantification of data shown in **(b)**,  $n=3$ . Numbers of GAA repeats in two alleles of patient *FXN* genes are shown in parentheses.
